# Supplementary material
Source: Research Square preprint supplement (doi:10.21203/rs.3.rs-10177982/v1)
Supplement: Supplementary file 1 [file 7007a4e76776bfc373897e5e.docx]

## Appendix A: Dataset Statistics

**Total graphs:** 3,429 (Version 1 - frozen)

**Graphs per family:** - Watts-Strogatz: 2,000 (58.4%) - Erdős–Rényi: 916 (26.7%) - Barabási–Albert: 357 (10.4%) - Random regular: 156 (4.5%)

**Size distribution:** - Mean: 34.6 vertices - Range: 5-60 vertices - Median: 35 vertices

**Exact computation coverage:** - χ exact: 2,101/3,429 (61.3%) - ω exact: 2,101/3,429 (61.3%) - α exact: 2,101/3,429 (61.3%) - γ exact: 1,655/3,429 (48.3%)
